# Supplementary material
Source: Springer Nature journal article supplement (https://www.springermedizin.de/resource/supplementary/12891_2010_843_MOESM4_ESM.pdf/9507150)
Supplement: MOESM4 [file 9507150]

| Radiographs & Event forms | Screening | Enrollment | Baseline | < 48h<br>post surgery | 1 week<br>(3-10 d) | 3 weeks<br>(11-28 d) | 6 weeks<br>(4-8 we) | 3 months<br>(11-15 we) | 6 months<br>(5-7 mo) | 12 months<br>11-13 mo) | 18 months<br>17-19 mo) | 24 months<br>(24-26 mo) |
|---------------------------|-----------|------------|----------|-----------------------|--------------------|----------------------|---------------------|------------------------|----------------------|------------------------|------------------------|-------------------------|
| CT                        | X         |            |          |                       |                    |                      |                     |                        |                      | X                      |                        |                         |
| Screening                 | X         |            |          |                       |                    |                      |                     |                        |                      |                        |                        |                         |
| Informed Consent          |           | X          |          |                       |                    |                      |                     |                        |                      |                        |                        |                         |
| Randomization             |           | X          |          |                       |                    |                      |                     |                        |                      |                        |                        |                         |
| Baseline data             |           |            | X        |                       |                    |                      |                     |                        |                      |                        |                        |                         |
| Pre-operative care        |           |            | X        |                       |                    |                      |                     |                        |                      |                        |                        |                         |
| DASH                      |           |            | X        |                       | X                  | X                    | X                   | X                      | X                    | X                      |                        | X                       |
| Pain (VAS)                |           |            | X        |                       | X                  | X                    | X                   | X                      | X                    | X                      |                        | X                       |
| SF-36                     |           |            | X        |                       |                    |                      | X                   | X                      | X                    | X                      |                        | X                       |
| EQ-5D                     |           |            | X        |                       |                    |                      | X                   | X                      | X                    | X                      |                        | X                       |
| Health Care Consumption   |           |            | X        |                       |                    |                      | X                   | X                      | X                    | X                      | X (postal)             | X                       |
| Surgical report form      |           |            |          | X                     |                    |                      |                     |                        |                      |                        |                        |                         |
| Post-operative care       |           |            |          | X                     |                    |                      |                     |                        |                      |                        |                        |                         |
| Radiographs               |           |            |          |                       | X                  | X                    | X                   | X                      |                      | X                      |                        |                         |
| Clinic FU                 |           |            |          |                       | X                  | X                    | X                   | X                      | X                    | X                      |                        | X                       |
| Revision surgery          |           |            |          |                       | X                  | X                    | X                   | X                      | X                    | X                      |                        | X                       |
| Complications             |           |            |          |                       | X                  | X                    | X                   | X                      | X                    | X                      |                        | X                       |
| ADL                       |           |            |          |                       | X                  | X                    | X                   | X                      | X                    | X                      |                        | X                       |
| AVN                       |           |            |          |                       | X                  | X                    | X                   | X                      | X                    | X                      |                        | X                       |
| Constant score            |           |            |          |                       |                    |                      | X                   | X                      | X                    | X                      |                        | X                       |
| Early withdrawal          |           |            |          |                       | *                  | *                    | *                   | *                      | *                    | *                      |                        | *                       |

\* Only at time of withdrawal
